# Supplementary material
Source: PubMed Central journal article supplement (PMC3620721)

# Absolute Configuration of Isosilybin A by X-ray Crystallography of the Heavy Atom Analogue 7-(4-Bromobenzoyl)isosilybin A

Arlene A. Sy-Cordero,<sup>†</sup> Cynthia S. Day,<sup>‡</sup> and Nicholas H. Oberlies<sup>†,\*</sup>

<sup>†</sup>Department of Chemistry and Biochemistry, University of North Carolina at Greensboro, Greensboro, NC 27402

<sup>‡</sup>Department of Chemistry, Wake Forest University, Winston-Salem, NC 27109

\*To whom correspondence should be addressed. E-mail: Nicholas\_Oberlies@uncg.edu. Tel: 336-334-5474.

## Supporting Information

### Contents:

**Figure S1.** <sup>1</sup>H NMR spectra of isosilybin A (**1**) and 7-(4-bromobenzoyl)isosilybin A (**5**) in DMSO-*d*<sub>6</sub>.

**Figure S2.** CD data of isosilybin A (**1**), isosilybin B (**2**), and 7-(4-bromobenzoyl)isosilybin A (**5**) in MeOH.

**Figure S1.**  $^1\text{H}$  NMR spectra of isosilybin A (**1**) and 7-(4-bromobenzoyl)-isosilybin A (**5**) in  $\text{DMSO-}d_6$ .

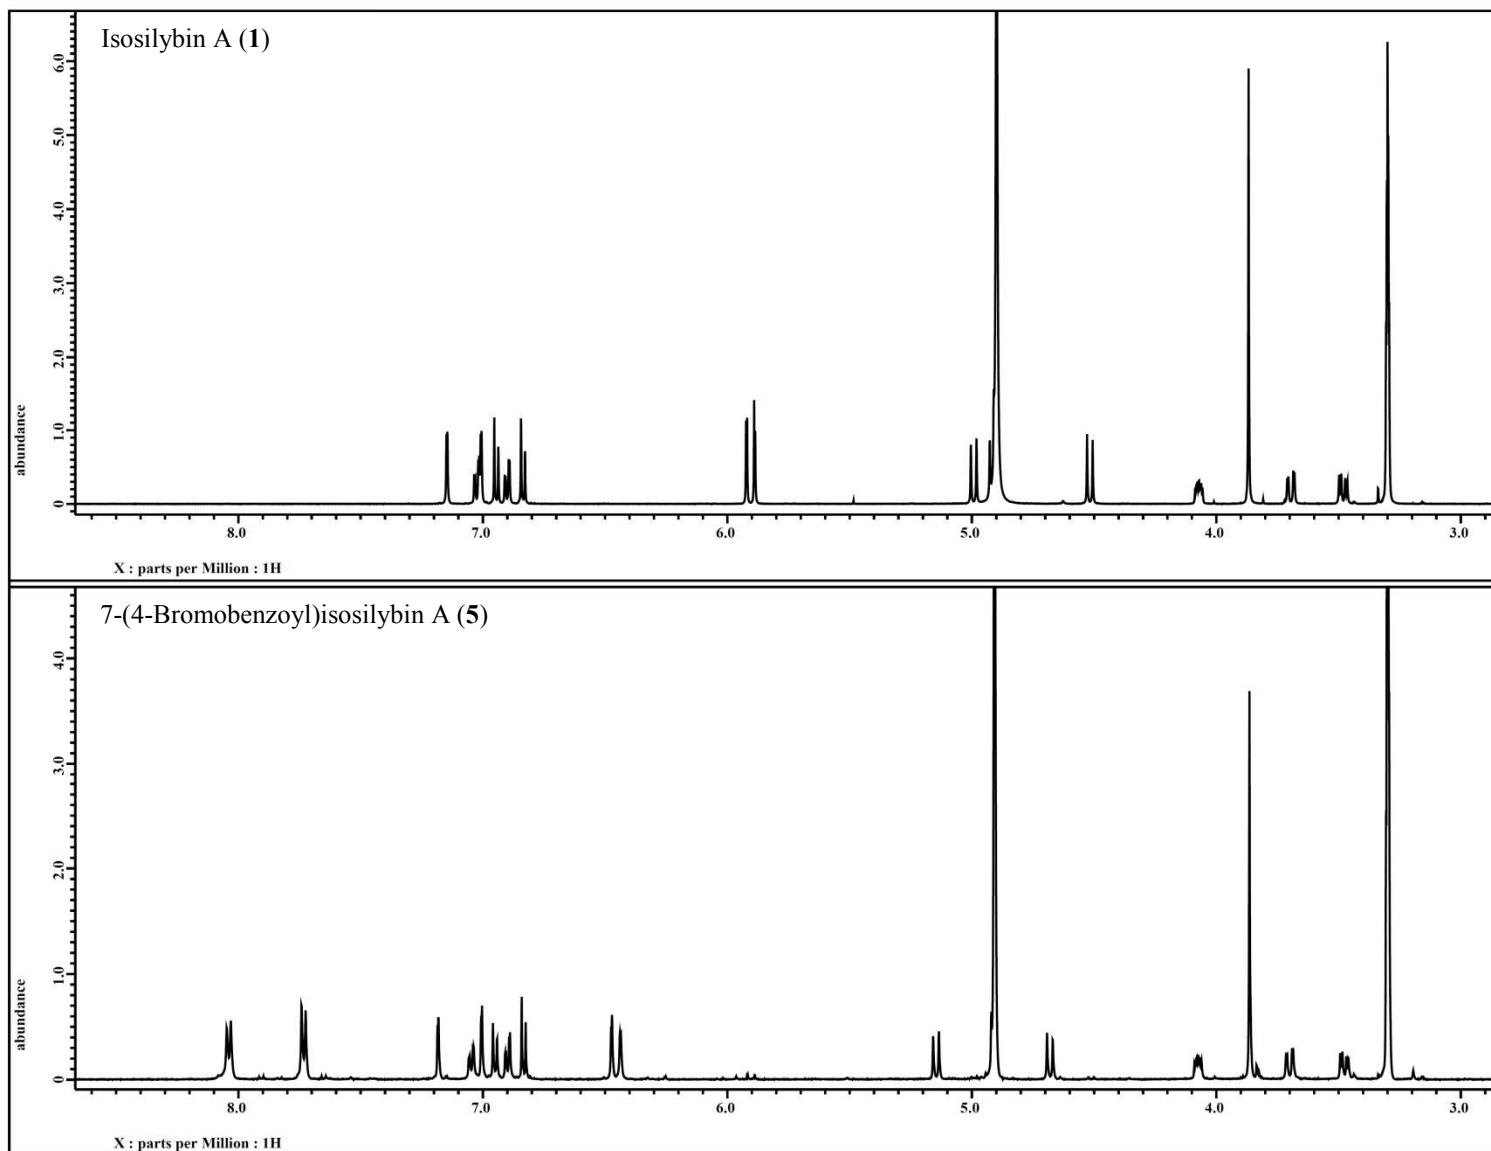

**Figure S2.** CD data of isosilybin A (**1**), isosilybin B (**2**), and 7-(4-bromobenzoyl)isosilybin A (**5**) in MeOH.

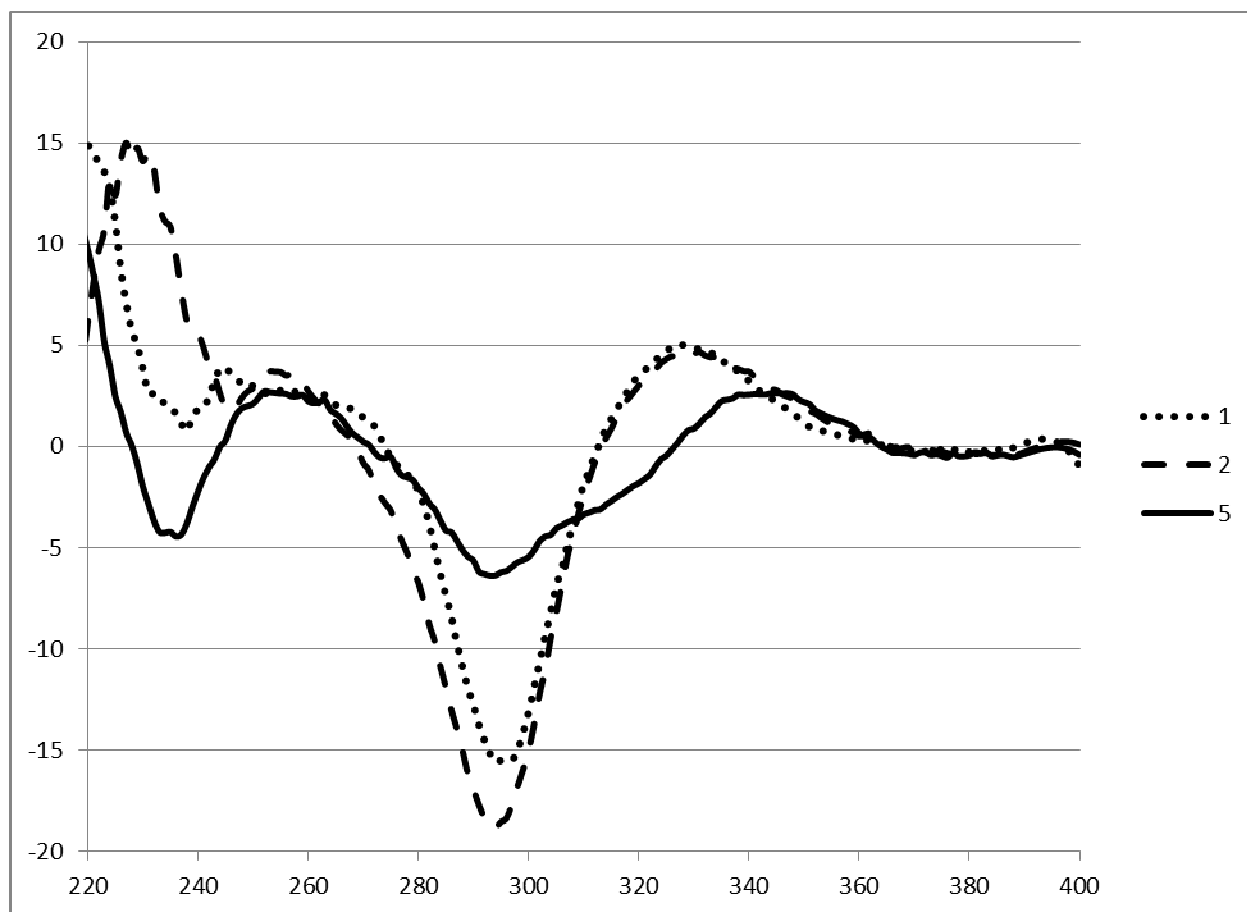

Supplement: NIHMS419262-supplement-1_si_001.pdf [file NIHMS419262-supplement-1_si_001.pdf]
